# Supplementary material
Source: PubMed Central journal article supplement (PMC3731447)
Supplement: NIHMS464437-supplement-1.pdf [file NIHMS464437-supplement-1.pdf]

## Supporting Information

### Tandem MS Analysis of Selenamide-Derivatized Peptide Ions

Yun Zhang<sup>1</sup>, Hao Zhang<sup>2</sup>, Weidong Cui<sup>2</sup>, and Hao Chen<sup>1\*</sup>

<sup>1</sup>*Center for Intelligent Chemical Instrumentation, Department of Chemistry and  
Biochemistry, Ohio University, Athens, OH, USA 45701*

<sup>2</sup>*Department of Chemistry, Washington University in St. Louis, St. Louis, MO, USA, 63130*

Figures S-1a, b, c display the ESI-MS spectra showing the reactions of ebselen with HCKFWW, NRCSQGSCWN, the insulin chain B, respectively. In Figure S-1a, the protonated ebselen was seen at  $m/z$  276.1 and the doubly charged reaction product  $[\text{HC}^*\text{KFWW}+2\text{H}]^{2+}$  was observed at 591.2. In Figure S-1b,  $m/z$  1704.4, 852.7 and 1429.4 correspond to  $[\text{NRC}^*\text{SQGSC}^*\text{WN}+\text{H}]^+$ ,  $[\text{NRC}^*\text{SQGSC}^*\text{WN}+2\text{H}]^{2+}$ , and  $[\text{NRC}^*\text{SQGSCWN}+\text{H}]^+$  (the exact position of the ebselen tag is uncertain), respectively. In Figure S-1c, the +2, +3 and +4 ions of the insulin chain B containing two ebselen tags were seen at  $m/z$  1975.4, 1317.3 and 988.3, respectively. Also,  $m/z$  267.1 was from the excess amount of TCEP.

Figures S-1d, e, f show the ESI-MS spectra for the reactions of NPSP with HCKFWW, NRCSQGSCWN and the insulin chain B, respectively. As shown in Figure S-1d,  $[\text{HC}^*\text{KFWW}+\text{H}]^+$  and  $[\text{HC}^*\text{KFWW}+2\text{H}]^{2+}$  were observed at  $m/z$  1062.4 and 531.7, respectively. The peak at  $m/z$  191.0 probably corresponds to the protonated  $\text{PhSe}(=\text{O})\text{OH}$ . In Figure S-1e,  $[\text{NRC}^*\text{SQGSC}^*\text{WN}+2\text{H}]^{2+}$  was observed at  $m/z$  733.6. Also, +1 and +2 ions of the oxidized peptide (probably due to air oxidation) were seen at  $m/z$  1152.4 and 576.7, respectively. In Figure S-1f,  $m/z$  1237.7 and 928.6 correspond to  $[\text{FVNQHLC}^*\text{GSHLVEALYLVC}^*\text{GERGFFYTPKA}+3\text{H}]^{3+}$  and

[FVNQHLC'GSHLVEALYLVC'GERGFFYTPKA+4H]<sup>4+</sup> respectively. In this case, +2, +3 and +4 ions of the oxidized chain B were also observed at *m/z* 1699.4, 1133.3 and 850.3, respectively.

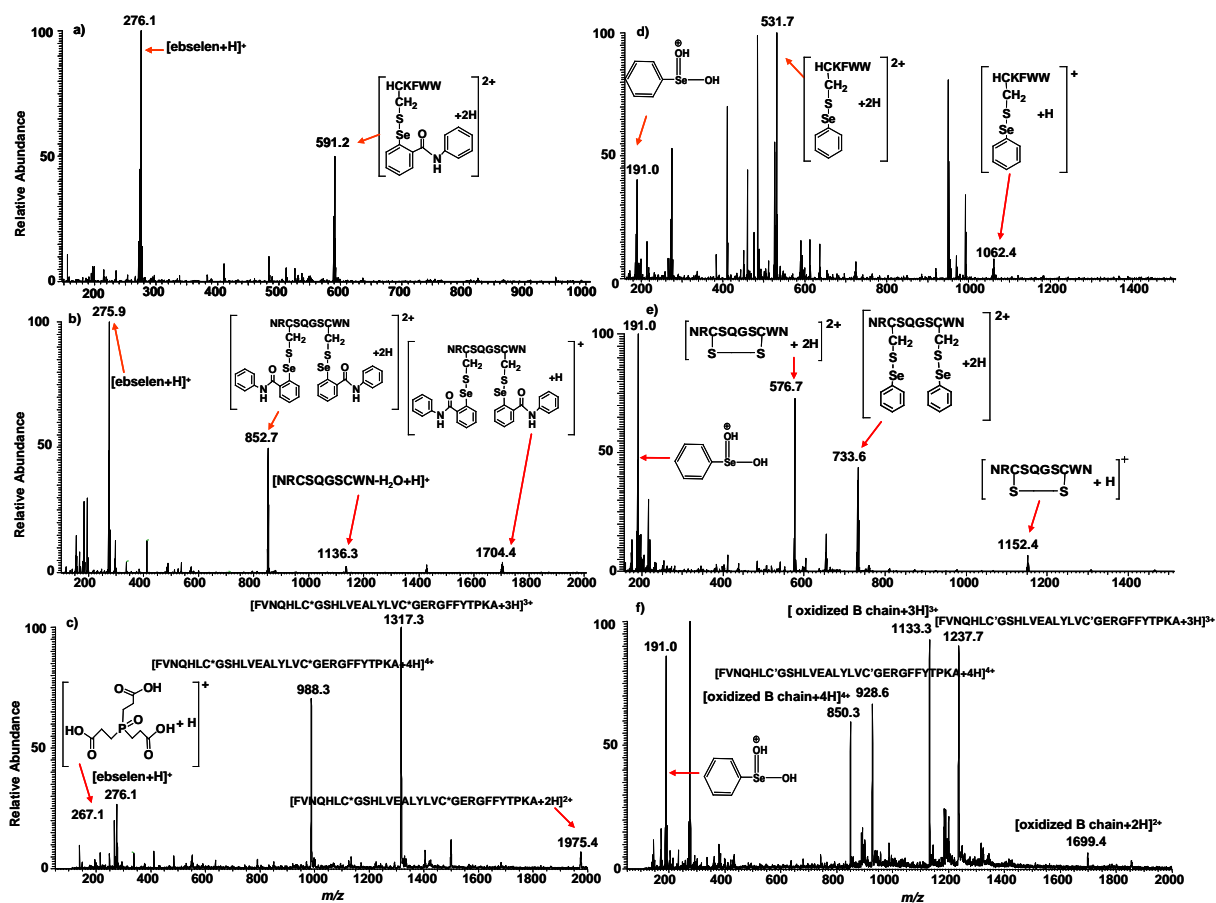

**Figure S-1.** ESI-MS spectra showing (a) the reaction of HCKFWW with ebselen; (b) the reaction of NRCSQGSCWN with ebselen; (c) the reaction of the insulin chain B with ebselen; (d) the reaction of HCKFWW with NPSP; (e) the reaction of NRCSQGSCWN with NPSP; (f) the reaction of the insulin chain B with NPSP.

Figure S-2 shows the MS/MS/MS mass spectrum of the singly charged ion of NRCSQGSCWN with one ebselen tag (*m/z* 1429.4) generated via CID of [NRC\*SQGSC\*WN+2H]<sup>2+</sup> (*m/z* 852.8) by loss of one protonated ebselen. This MS/MS/MS mass spectrum shows the presence of a group of fragment ions *b*<sub>5</sub><sup>\*</sup>, *b*<sub>6</sub><sup>\*</sup>, *b*<sub>7</sub><sup>\*</sup>, and *b*<sub>7</sub><sup>\*</sup>-NH<sub>3</sub> from

dissociation of  $[\text{NRC}^*\text{SQGSCWN}+\text{H}]^+$  and another group of fragment ions  $b_4$ ,  $b_5$ ,  $b_5\text{-NH}_3$ ,  $b_6$ ,  $b_7$ ,  $b_7\text{-NH}_3$ ,  $y_3^*$ ,  $y_6^*$  from dissociation of  $[\text{NRCSQGSC}^*\text{WN}+\text{H}]^+$ . Thus, it can be seen that the loss of ebselen tag from  $[\text{NRC}^*\text{SQGSC}^*\text{WN}+2\text{H}]^{2+}$  ( $m/z$  852.8) has no regioselectivity, which can occur either to Cys-3 or to Cys-8.

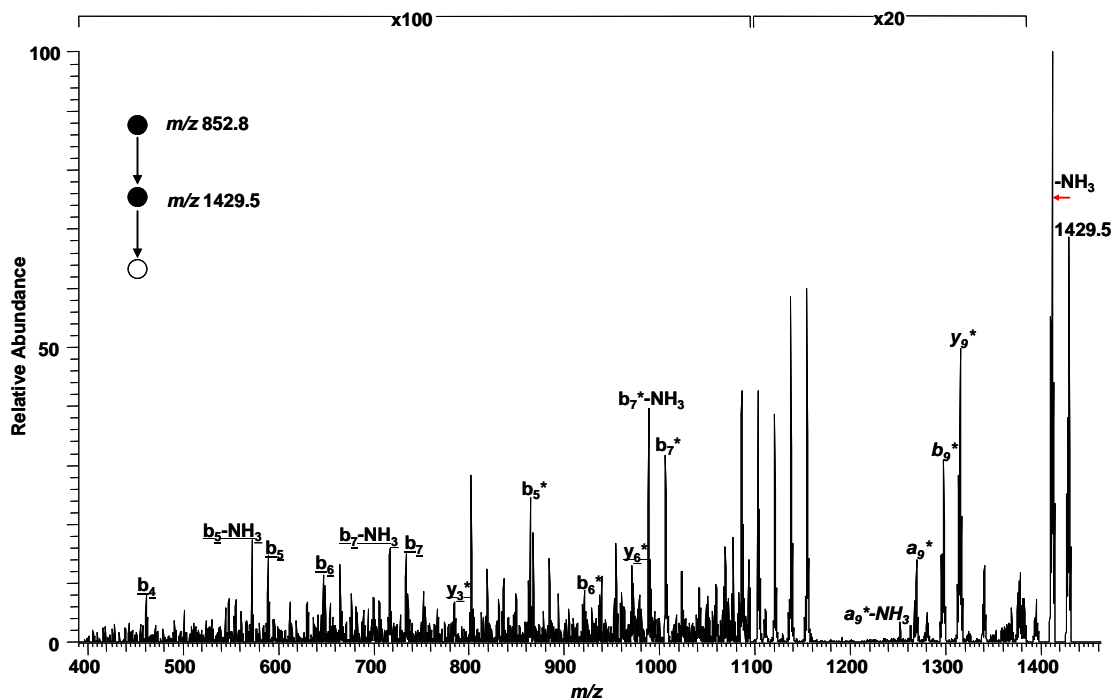

**Figure S-2.** CID-MS/MS/MS mass spectrum of singly charged ion of  $m/z$  1429.5 (a mixed  $[\text{NRC}^*\text{SQGSCWN}+\text{H}]^+$  and  $[\text{NRCSQGSC}^*\text{WN}+\text{H}]^+$ )

Figure S-3 shows ETD MS/MS mass spectra of  $[\text{C}^*\text{QDSETRTFY}+2\text{Na}]^{2+}$  ( $m/z$  784.8) and  $[\text{C}'\text{QDSETRTFY}+2\text{Na}]^{2+}$  ( $m/z$  725.3) generated by ESI of a mixture of peptide CQDSETRTFY (MW 1248.5 Da), NPSP and NaCl in ACN/H<sub>2</sub>O/HOAc (50:50:1 by volume). Both Figure S-3a and S-3b show the facile loss of the selenium tag.

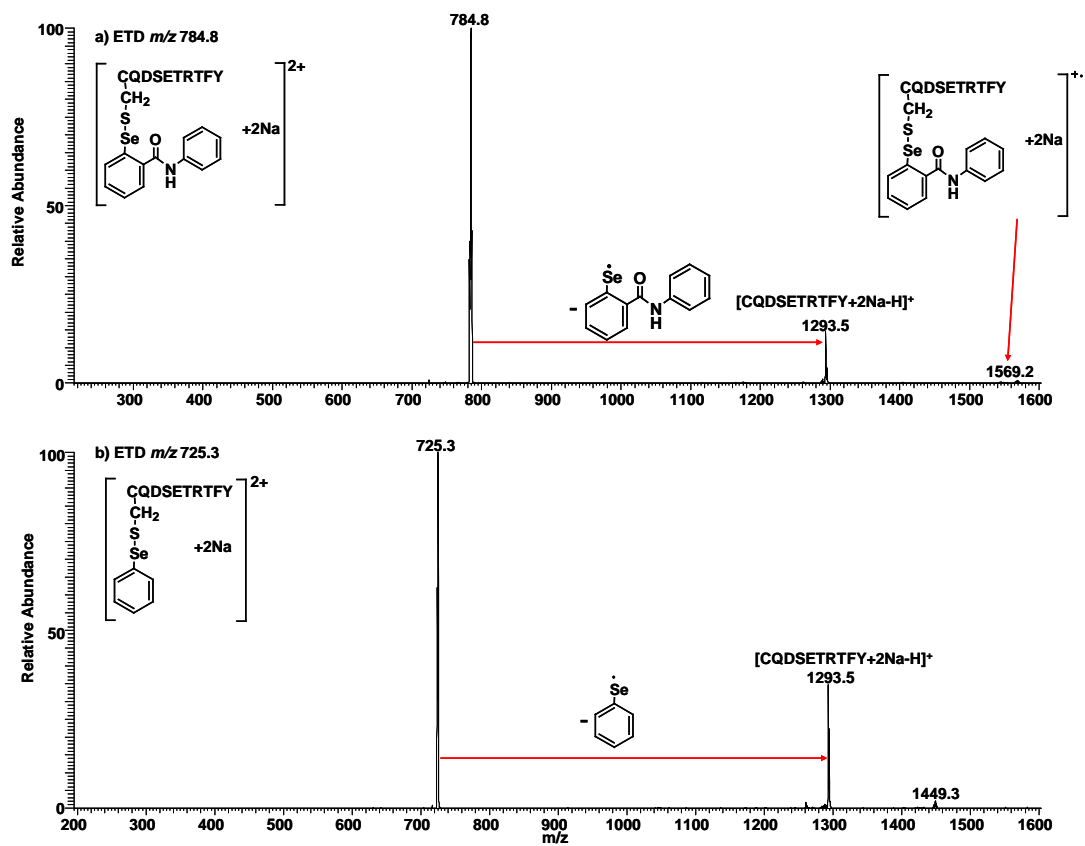

**Figure S-3.** ETD MS/MS mass spectra of (a) of [C\*QDSETRTFY+2Na]<sup>2+</sup> (*m/z* 784.8) and [C'QDSETRTFY+2Na]<sup>2+</sup> (*m/z* 725.3).
